# Supplementary material for: Tungsten nitride on a porous carbon support as a highly durable electrocatalyst for the hydrogen evolution reaction
Source: Royal Society of Chemistry journal article supplement (doi:10.1039/d5ya00253b), 2025-12-10
Supplement: d5ya00253b1.pdf [file d5ya00253b1.pdf]

Supporting information

## **Tungsten Nitride on Porous Carbon Support as a Highly Durable Electrocatalyst for Hydrogen Evolution Reaction**

Shankar Baskaran, Gokul Pandiyan Mageswari, J. Anjana and Azhagumuthu  
Muthukrishnan\*

School of Chemistry, Indian Institute of Science Education and Research  
Thiruvananthapuram, Maruthamala P.O., Vithura-695551, Kerala, India

Email: [muthukrishnan@iisertvm.ac.in](mailto:muthukrishnan@iisertvm.ac.in)

## Synthesis of control samples

### Synthesis of $\beta$ -W<sub>2</sub>N

Tungsten nitride was synthesised without carbon support as a control experiment by mixing WO<sub>3</sub> and urea in the ratio of 1:20, followed by the pyrolysis at 900 °C for 2 hours under N<sub>2</sub> atmosphere. The sample was confirmed using powder XRD as  $\beta$ -W<sub>2</sub>N.

### Synthesis of N-doped carbon

The N-doped carbon (carbon source is Ketjen Black) was synthesised by mixing the KB and urea in the ratio of 1:10, and pyrolysed at 900 °C for 2 hours under N<sub>2</sub> atmosphere. The resulting product is referred to as N-doped carbon (NC).

### Electrochemical surface area calculation for WN/NC catalysts

The electrochemically active surface area (ECSA) of the catalysts was calculated from the double-layer capacitance obtained by plotting the scan rate versus charging current at a particular potential. Previously, the cyclic voltammetry experiments were performed at different scan rates at N<sub>2</sub>-saturated electrolytes (McCrory *et al.*, *J. Am. Chem. Soc.* **2015**, 137 (13), 4347-4357). Subsequently, the ECSA of the material was calculated from the equation given below.

$$ECSA = \frac{C_{dl}}{C_s}$$

Where the value of C<sub>s</sub> is taken as 0.04 mF cm<sup>-2</sup> and 0.035 mF cm<sup>-2</sup> for alkaline and acidic electrolyte, respectively.

### Electrochemical surface area (ECSA) calculation for Pt/C catalyst

Similarly, the ECSA of the benchmark Pt/C catalyst is calculated from the H-UPD (hydrogen under potential deposition) region, obtained from the cyclic voltammetry at different electrolytes. The H-adsorption region (0.4 – 0 V) was chosen to calculate the ECSA of Pt/C catalysts. The charge of the H-adsorption was calculated from the CVs and the scan rate, and the ECSA is calculated as shown below.

$$ECSA = \frac{Q_H}{Q_s}$$

where  $Q_H$  represents the charge corresponding to the hydrogen adsorption, and  $Q_S$  is taken as  $230 \mu\text{C cm}^{-2}$  and  $145 \mu\text{C cm}^{-2}$  for 0.5 M  $\text{H}_2\text{SO}_4$  and 1 M  $\text{KOH}$  solutions, respectively. (Vidal-Iglesias *et al.*, *ACS Catal.* 2012, 2, 901–910)

### TOF calculation

The TOF of the catalyst was calculated as reported earlier (N. Logeshwaran *et. al.*, *J. Energy Chem.*, 86, 2023, 167-179) using the formula given below.

$$TOF = \frac{j}{F \times n \times \Gamma / N_A}$$

Where  $j$ ,  $N_A$ ,  $F$ ,  $n$  and  $\Gamma$  correspond to current density, Avagadro number, Faraday constant, number of electrons and number of active sites.

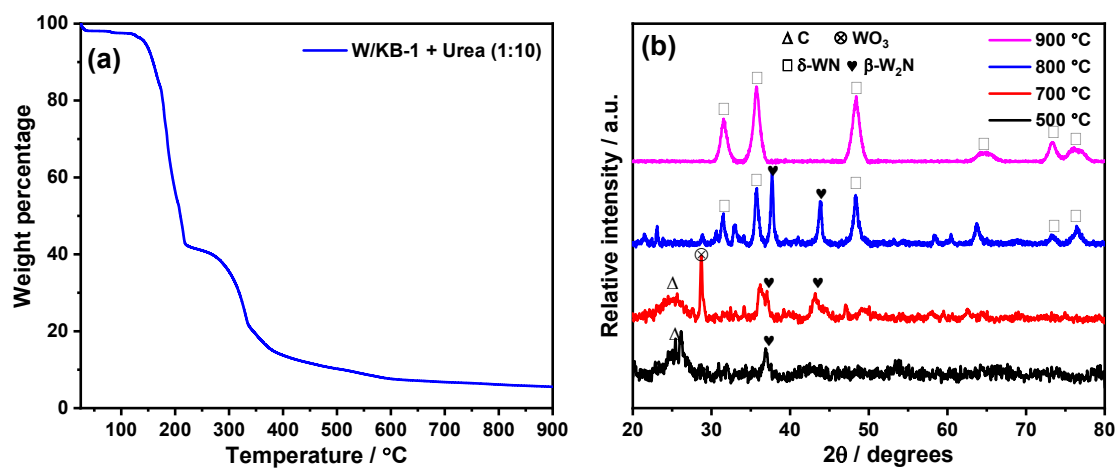

**Fig. S1.** (a) The thermogravimetric analysis of the precursors ( $\text{Na}_2\text{WO}_4 \cdot 2\text{H}_2\text{O} + \text{KB} + \text{urea}$ ) in  $\text{N}_2$ -atmosphere and (b) powder XRD patterns of heated precursors at various temperatures.

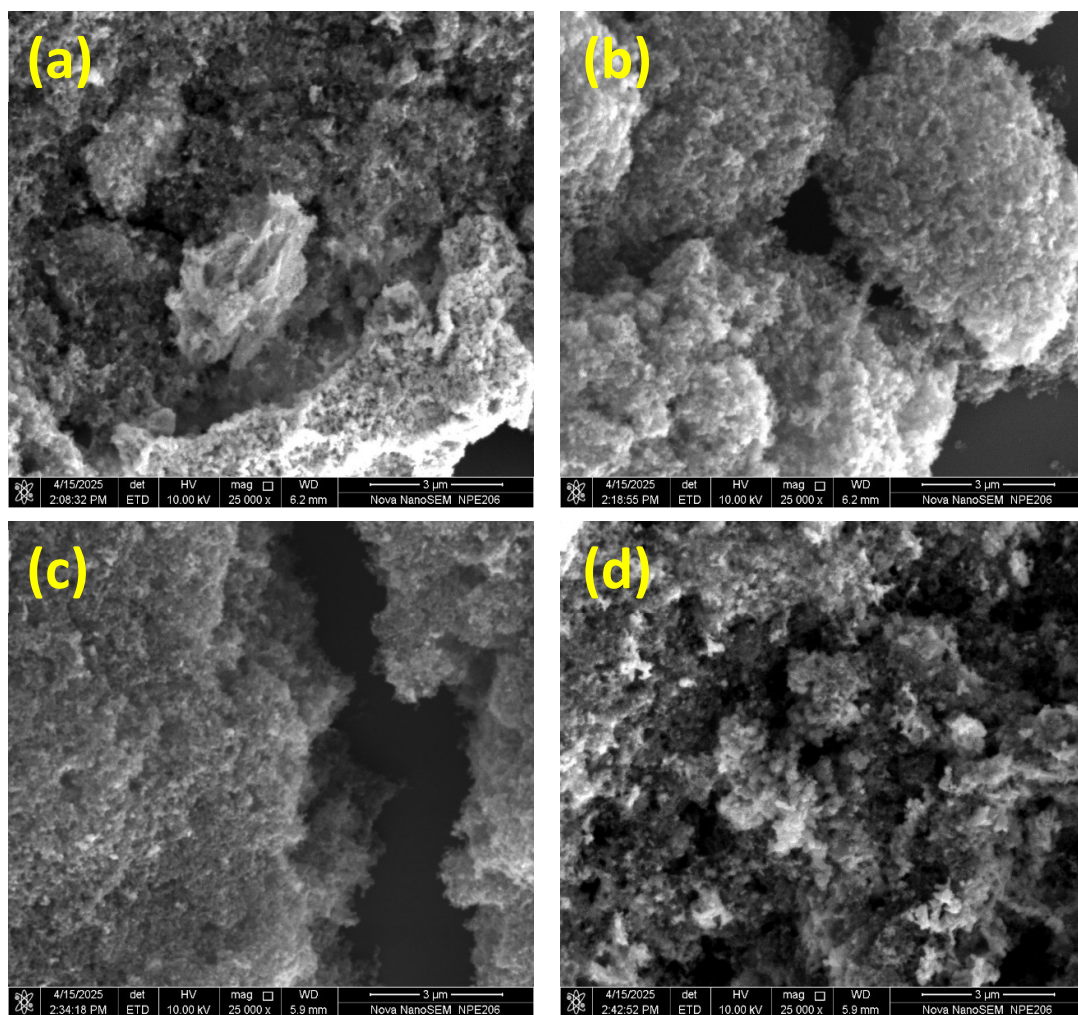

**Fig. S2.** Scanning electron microscopy images of (a) WN/NC-1, (b) WN/NC-2, (c) WN/NC-3 and (d) WN/NC-1A catalysts.

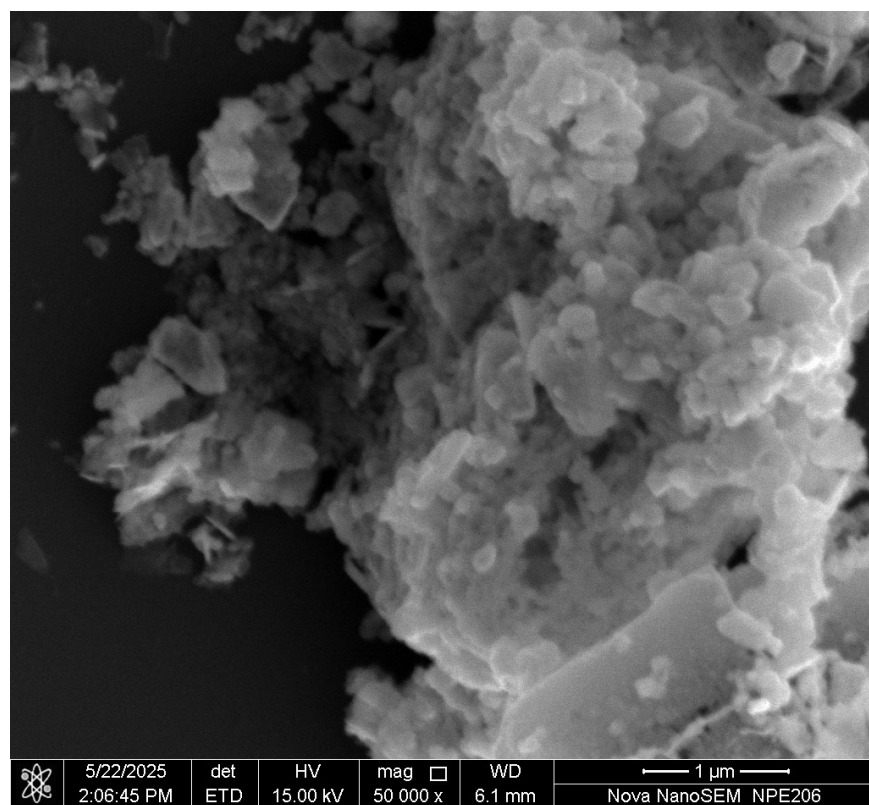

**Fig. S3.** Scanning electron microscopic image of  $\beta$ -W<sub>2</sub>N catalyst

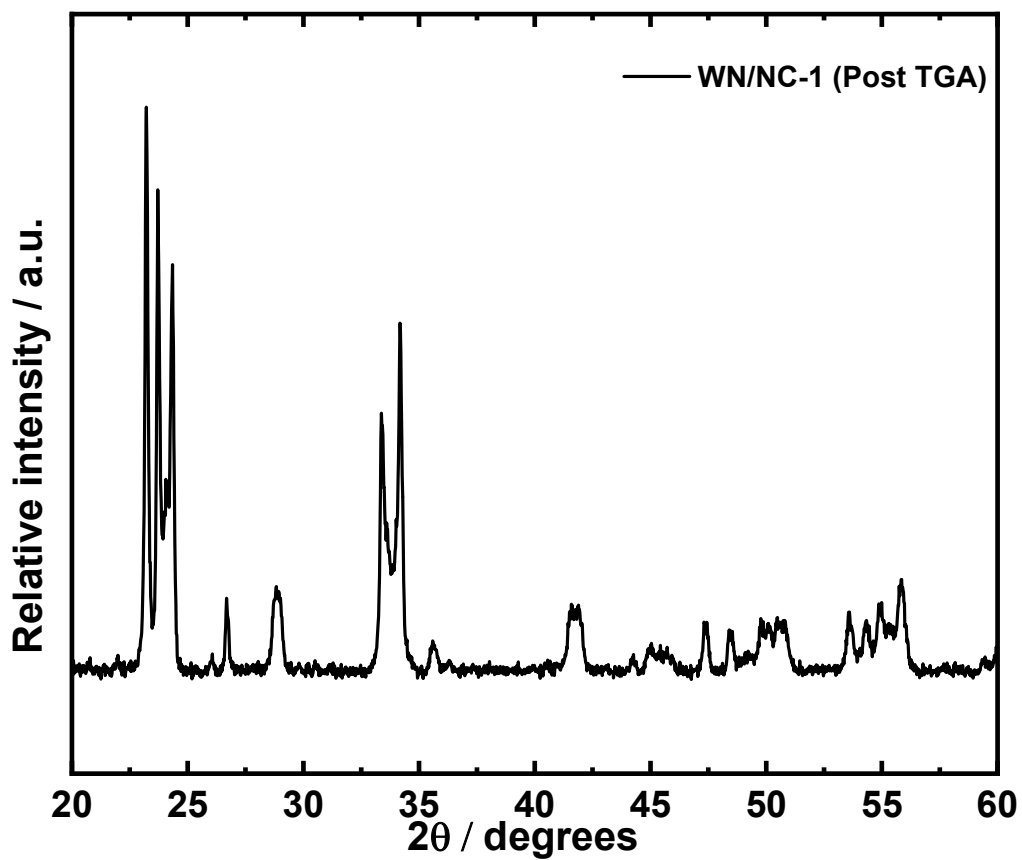

**Fig. S4.** Powder X-ray diffraction pattern of the residue obtained from the thermogravimetric experiment of WN/NC-1 under an air atmosphere.

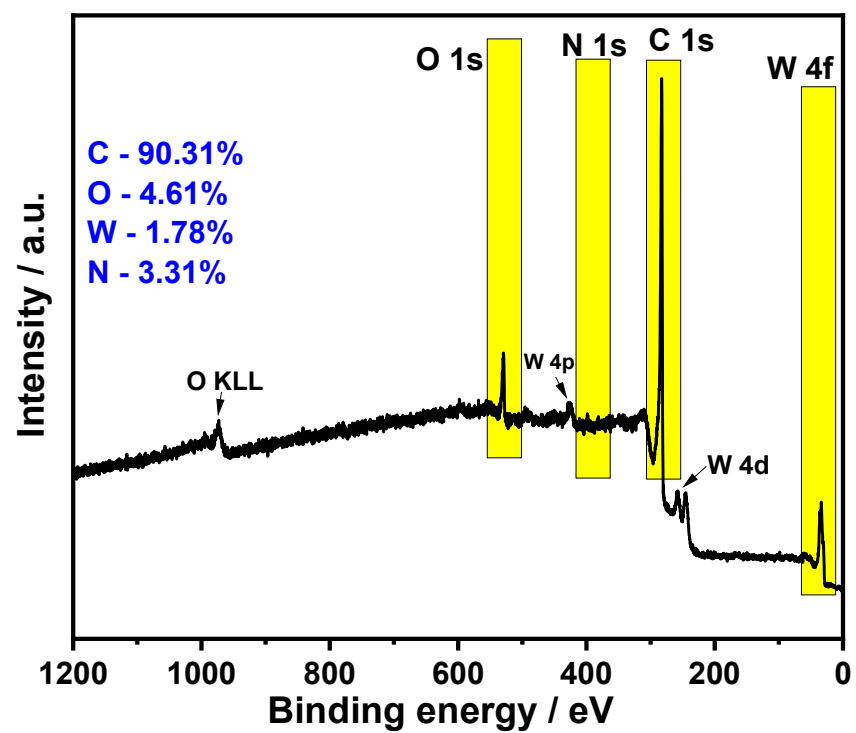

**Fig. S5.** Survey XPS of the WN/NC-1 catalyst.



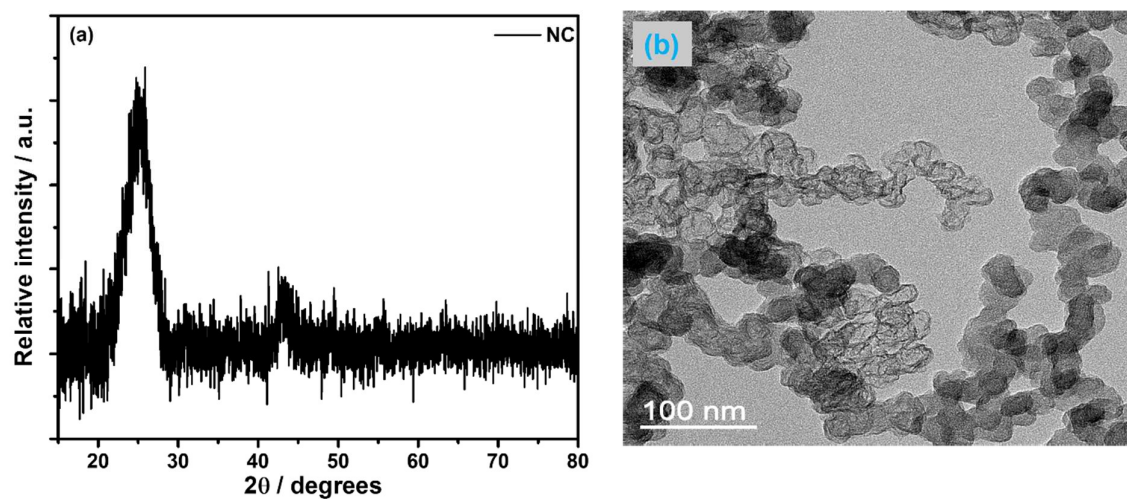

**Fig. S6.** Structural and morphological analysis of N-doped carbon (a) PXRD and (b) HR-TEM image

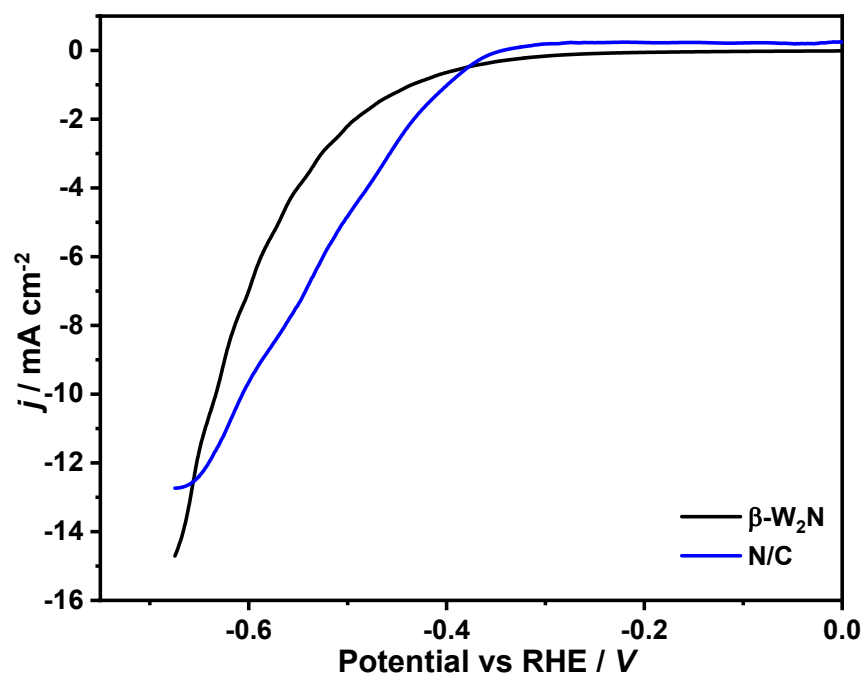

**Fig. S7.** Linear sweep voltammogram of  $\beta\text{-W}_2\text{N}$  and N/C control samples carried out in 0.5 M  $\text{H}_2\text{SO}_4$  as electrolyte

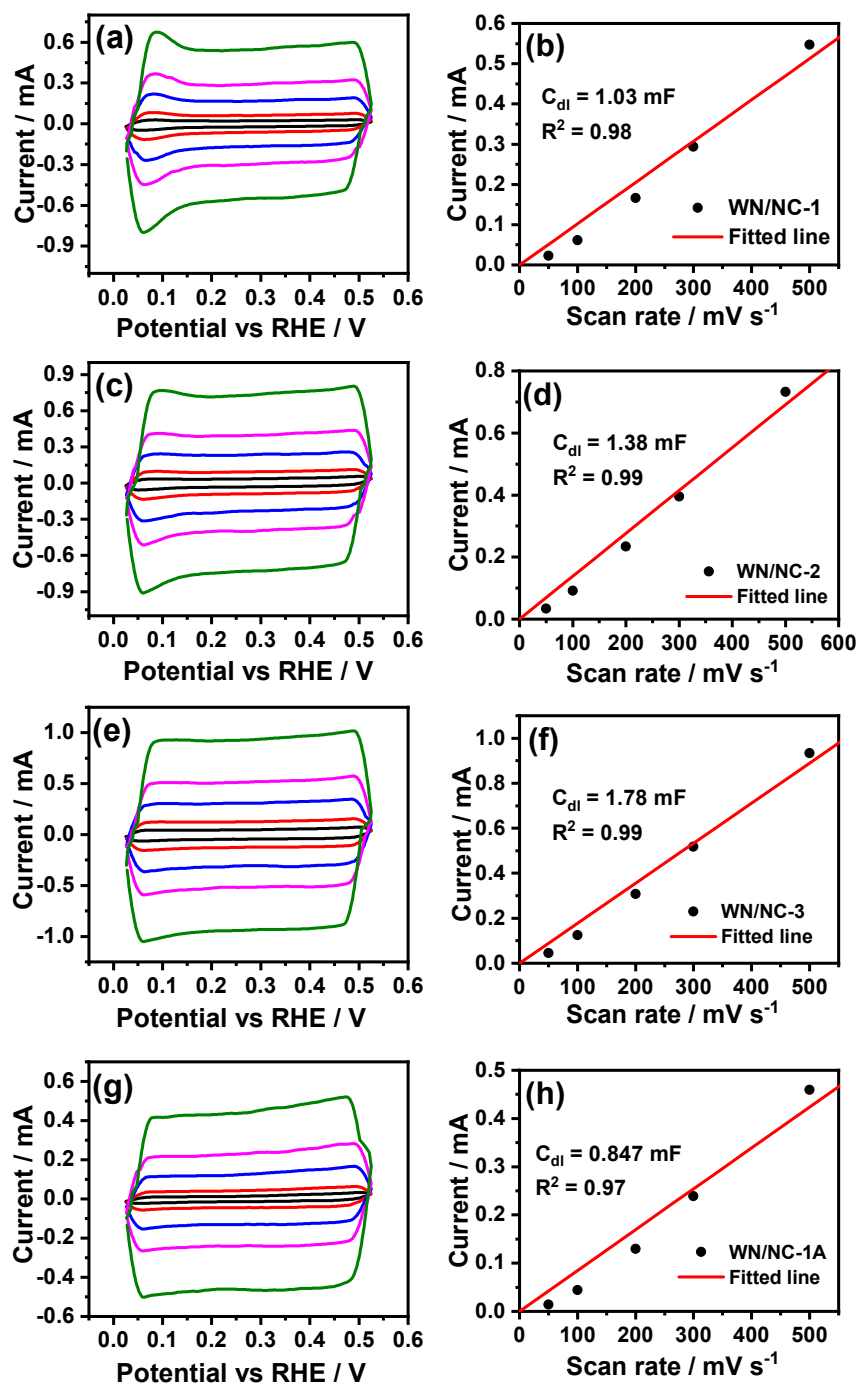

**Fig. S8.** Cyclic voltammetry in different scan rates (black: 50 mVs<sup>-1</sup>; red: 100 mVs<sup>-1</sup>; green: 200 mVs<sup>-1</sup>; blue: 300 mVs<sup>-1</sup>; magenta: 500 mVs<sup>-1</sup>;) and current vs scan rate plot of WN/NC-1 (a & b), WN/NC-2 (c & d), WN/NC-3 (e & f) and WN/NC-1A (g & h) in 0.5 M H<sub>2</sub>SO<sub>4</sub> as electrolyte.

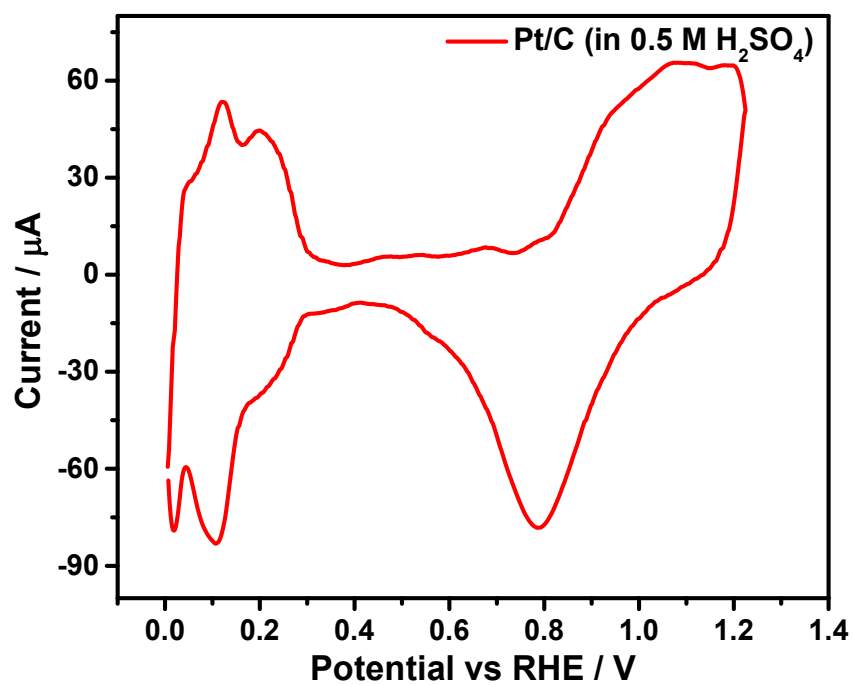

**Fig. S9.** Cyclic voltammogram of Pt/C catalyst at scan rate of 0.05 V s<sup>-1</sup> in 0.5 M H<sub>2</sub>SO<sub>4</sub> electrolyte

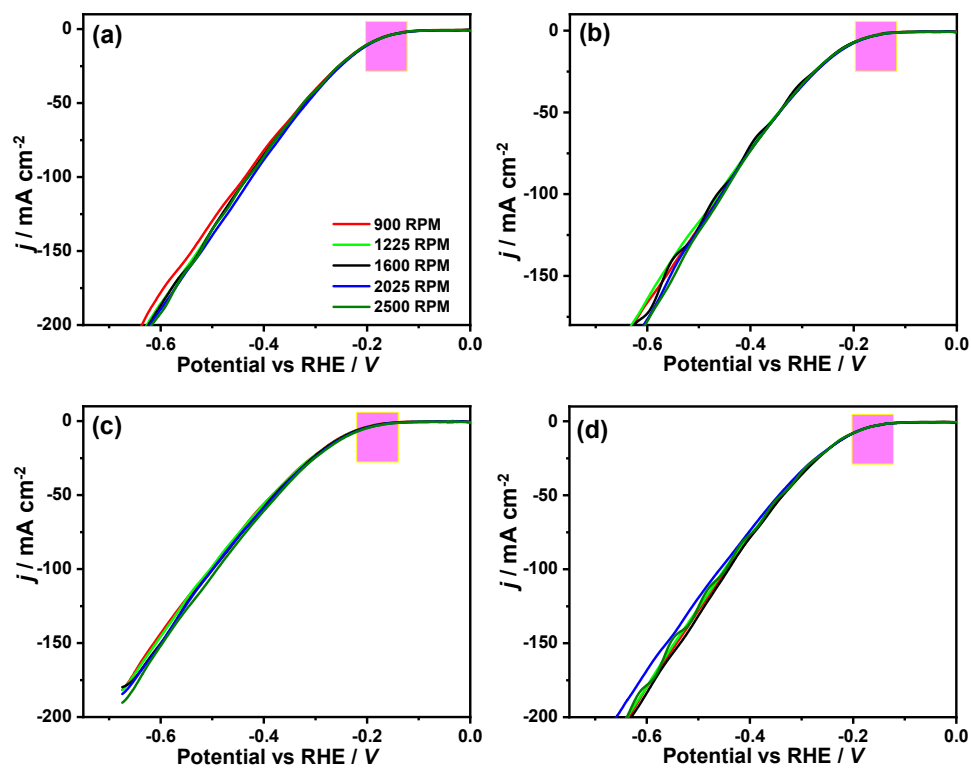

**Fig. S10.** Linear sweep voltammograms of (a) WN/NC-1, (b) WN/NC-2, (c) WN/NC-3 and (d) WN/NC-1A catalysts on various rotational speeds in 0.5 M  $\text{H}_2\text{SO}_4$  as electrolyte

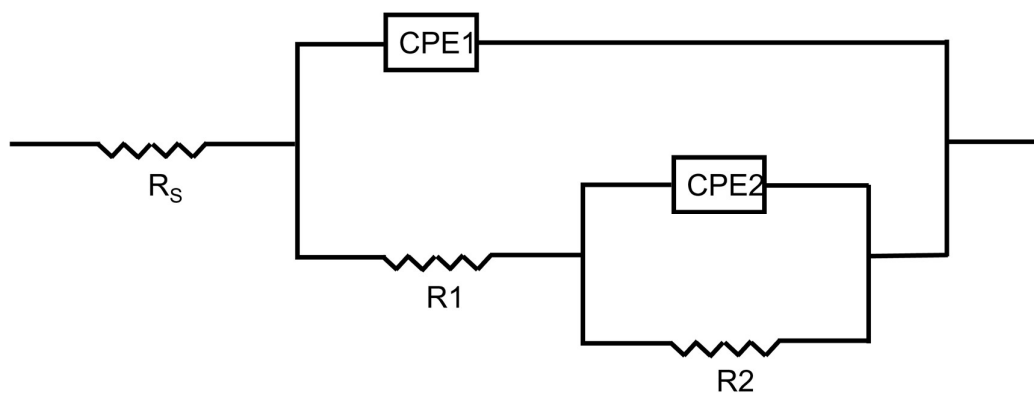

**Fig. S11.** Armstrong-Henderson equivalent circuit modified with constant phase element for investigation of electrochemical impedance spectroscopy

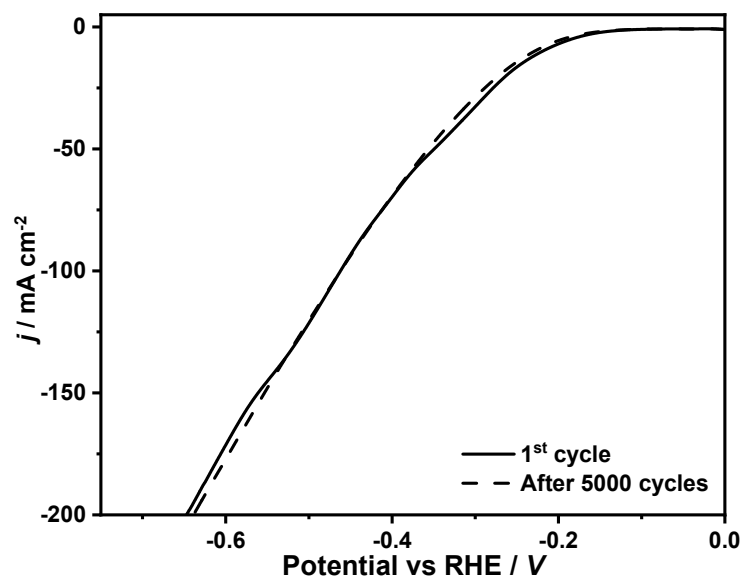

**Fig. S12.** Linear sweep voltammogram of WN/NC-1A catalyst before and after 5000 cyclic voltammetry cycles in HER carried out in 0.5 M  $\text{H}_2\text{SO}_4$  as electrolyte

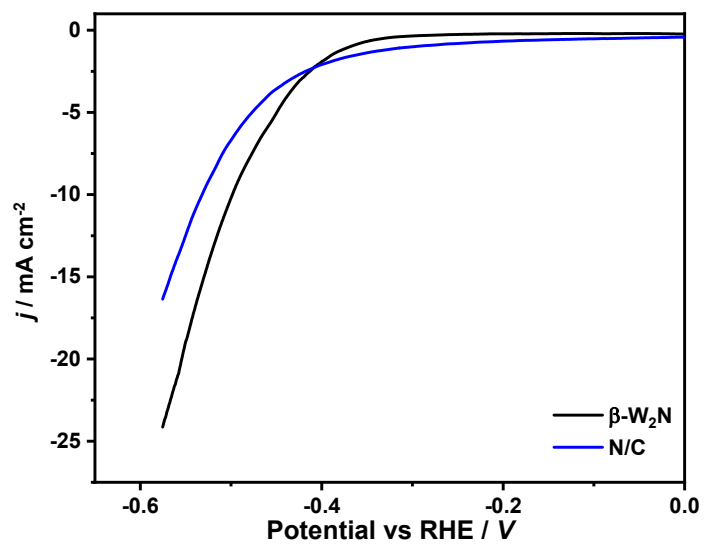

**Fig. S13.** Linear sweep voltammogram of  $\beta\text{-W}_2\text{N}$  and N/C control samples carried out in 1 M KOH as electrolyte



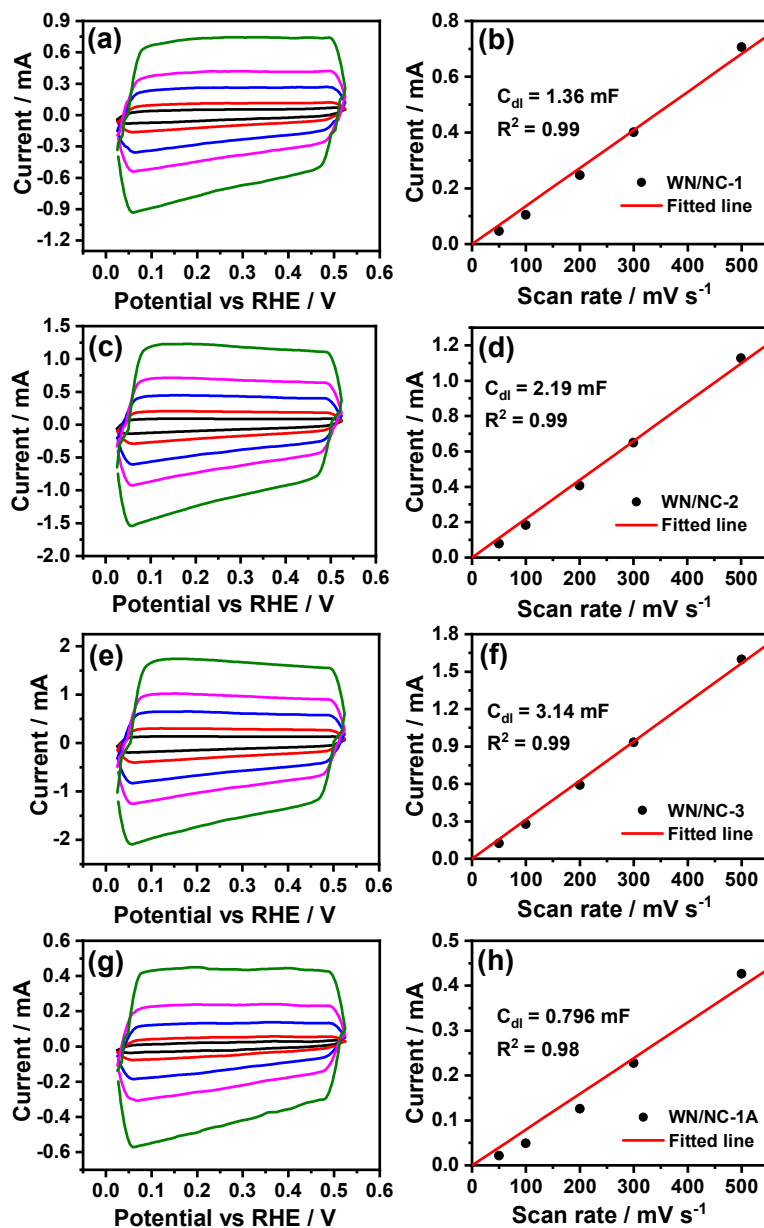

**Fig. S14.** Cyclic voltammetry in different scan rates (black: 50 mVs<sup>-1</sup>; red: 100 mVs<sup>-1</sup>; green: 200 mVs<sup>-1</sup>; blue: 300 mVs<sup>-1</sup>; magenta: 500 mVs<sup>-1</sup>;) and current vs scan rate plot of WN/NC-1 (a & b), WN/NC-2 (c & d), WN/NC-3 (e & f) and WN/NC-1A (g & h) in 1 M KOH as electrolyte.

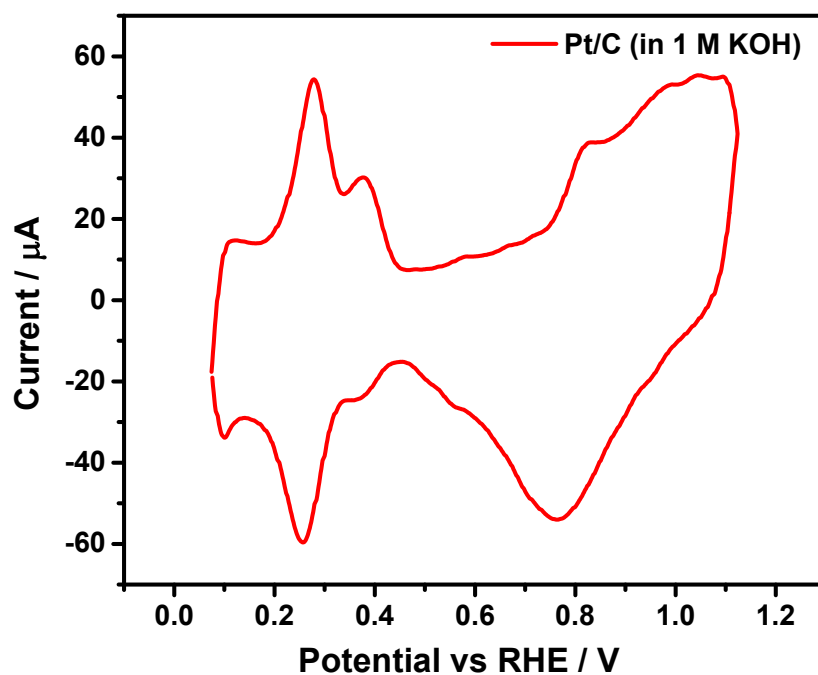

**Fig. S15.** Cyclic voltammogram of Pt/C catalyst at scan rate of 0.05 V s<sup>-1</sup> in 1 M KOH as electrolyte

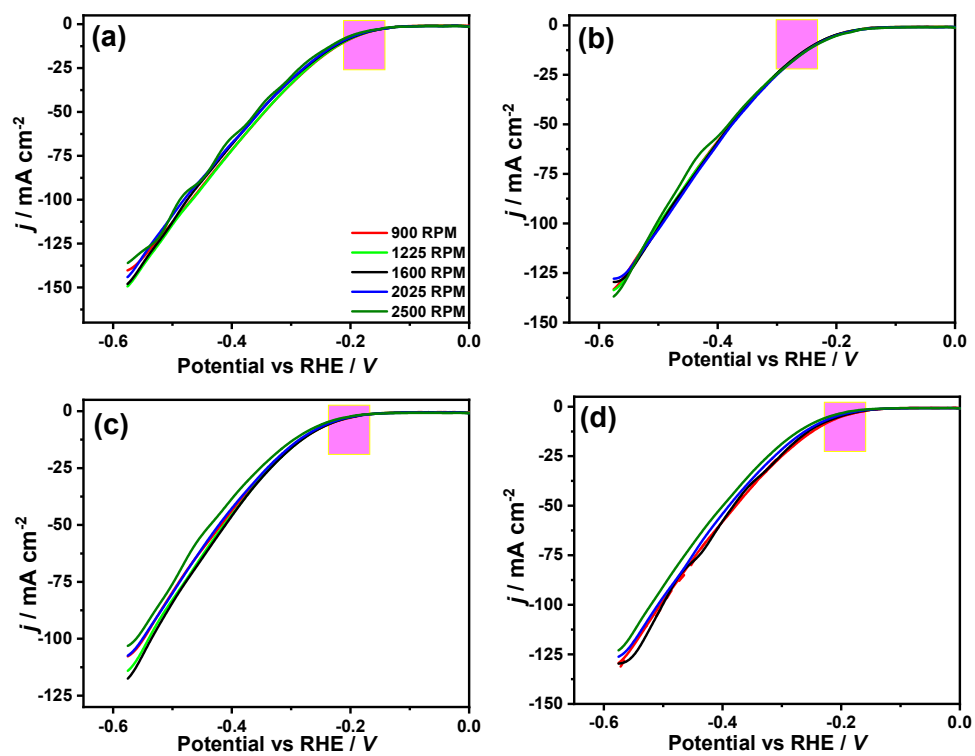

**Fig. S16.** Linear sweep voltammograms of (a) WN/NC-1, (b) WN/NC-2, (c) WN/NC-3 and (d) WN/NC-1A catalysts on various rotational speeds in  $\text{N}_2$ -saturated 1 M KOH electrolyte

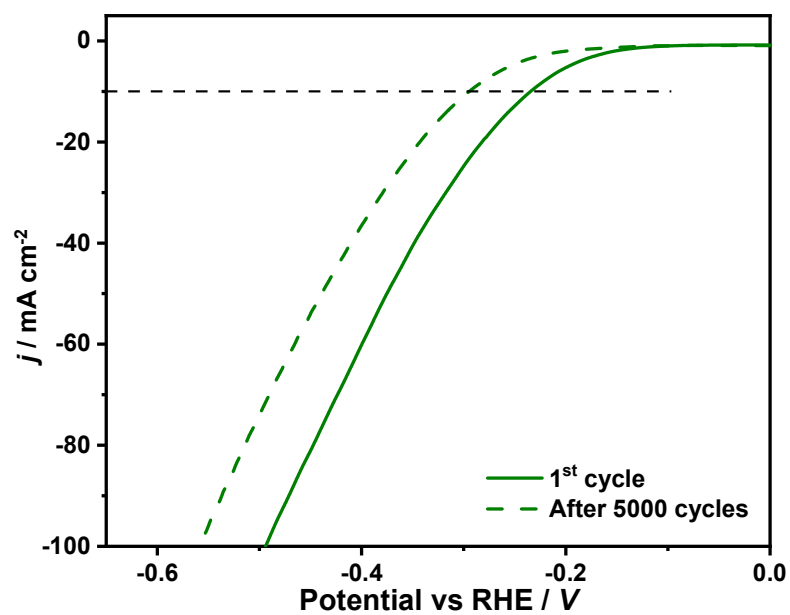

**Fig. S17.** Linear sweep voltammogram of WN/NC-1A catalyst before and after 5000 cyclic voltammetry cycles carried out in 1 M KOH as electrolyte

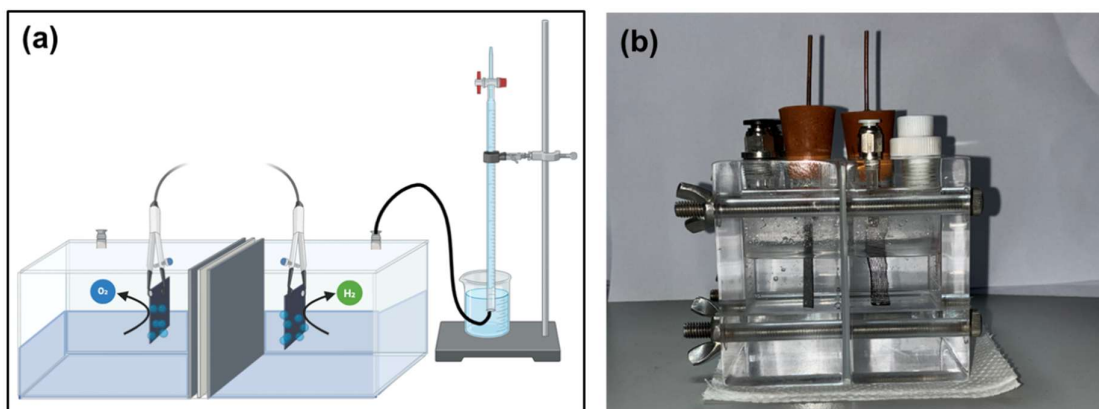

**Fig. S18.** (a) Typical pictorial representation of an eudiometry set-up to measure the volume of  $H_2$  gas evolved from the water electrolyser and (b) the photographic image of the electrolyser.

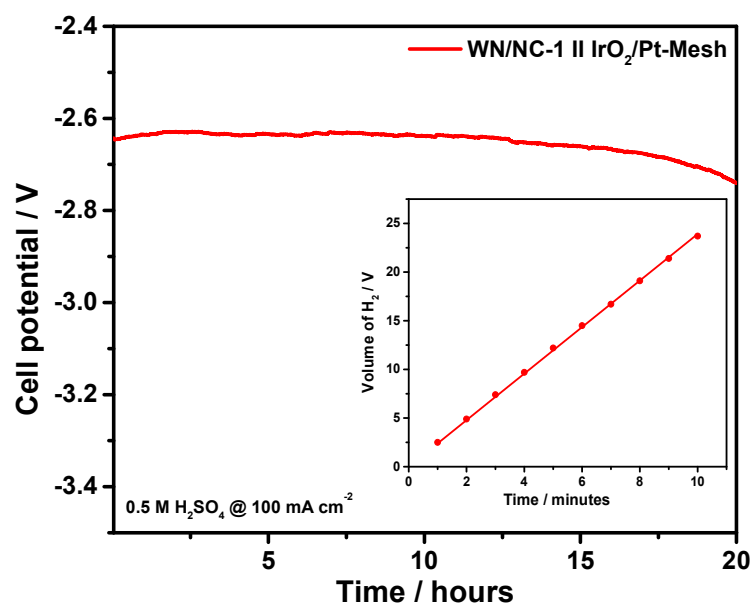

**Fig. S19.** Chronopotentiometry curve of WN/NC-1 catalyst employed as cathode in PEM water electrolyser at constant current density of  $100 \text{ mA cm}^{-2}$  with  $0.5 \text{ M H}_2\text{SO}_4$  as electrolyte

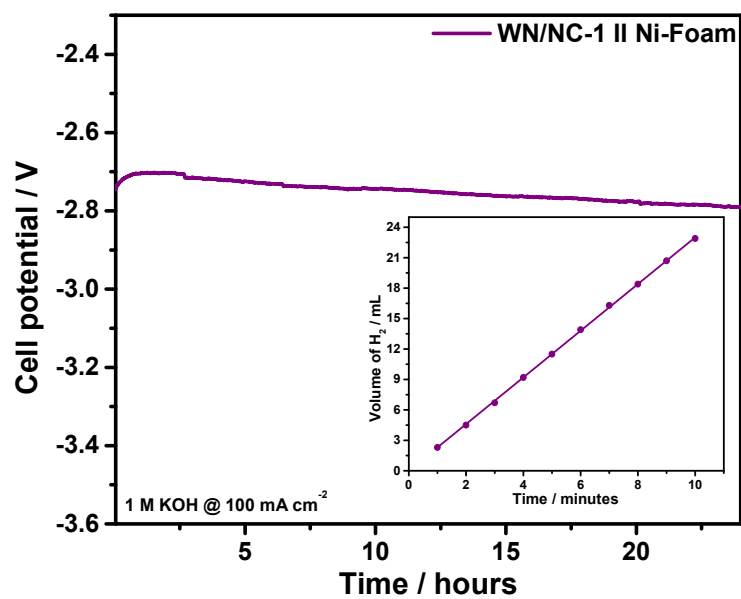

**Fig. S20.** Chronopotentiometry curve of WN/NC-1 catalyst employed as cathode in AEM water electrolyser at constant current density of 100 mA cm<sup>-2</sup> with 1 M KOH as electrolyte

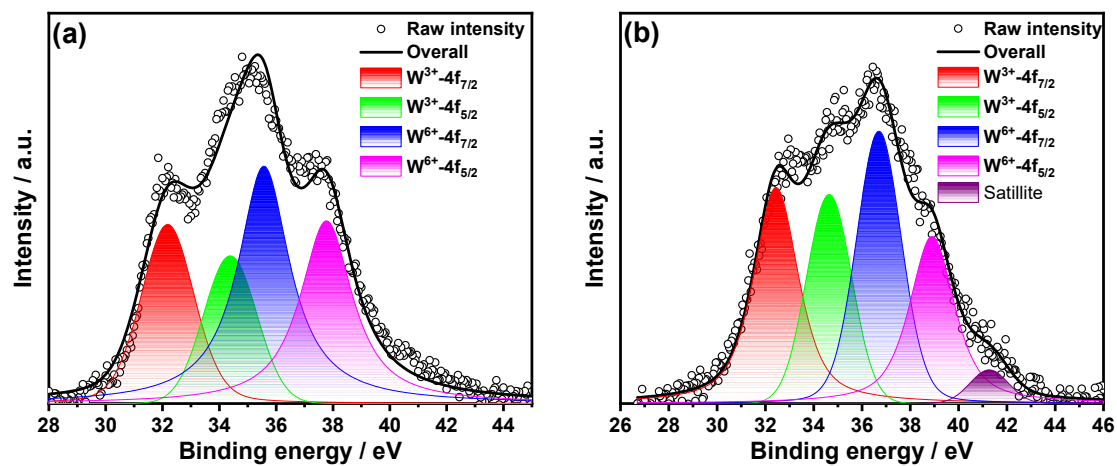

**Fig. S21.** The W-4f XPS of the WN/NC-1 after 100 hours of electrolysis in (a) 0.5 M  $\text{H}_2\text{SO}_4$  and (b) 1 M KOH electrolytes.



**Table S1.** Parameters obtained from the analysis of the N<sub>2</sub>-sorption isotherm of WN/NC catalysts

| Compounds | S <sub>BET</sub> (m <sup>2</sup> g <sup>-1</sup> ) | V <sub>BET</sub> (cm <sup>3</sup> g <sup>-1</sup> ) | S <sub>micro</sub> (m <sup>2</sup> g <sup>-1</sup> ) | V <sub>micro</sub> (cm <sup>3</sup> g <sup>-1</sup> ) |
|-----------|----------------------------------------------------|-----------------------------------------------------|------------------------------------------------------|-------------------------------------------------------|
| WN/NC-1   | 128.43                                             | 0.263                                               | -                                                    | -                                                     |
| WN/NC-2   | 321.16                                             | 0.426                                               | 47.87                                                | 0.024                                                 |
| WN/NC-3   | 480.22                                             | 0.546                                               | 99.36                                                | 0.048                                                 |
| WN/NC-1A  | 108.12                                             | 0.203                                               | -                                                    | -                                                     |

**Table S2.** The solution resistance ( $R_s$ ), charge transfer resistance ( $R_{ct}$ ) and pseudocapacitive resistance ( $R_{ps}$ ) parameters obtained from Electrochemical impedance spectroscopy (EIS) technique for WN/NC catalysts in 0.5 M H<sub>2</sub>SO<sub>4</sub> as electrolyte

| Compounds | $R_s$ ( $\Omega$ ) | $R_{ct}$ ( $\Omega$ ) | $R_{ps}$ ( $\Omega$ ) |
|-----------|--------------------|-----------------------|-----------------------|
| WN/NC-1   | 5.4                | 18.02                 | 0.351                 |
| WN/NC-2   | 5.4                | 25.54                 | 0.124                 |
| WN/NC-3   | 5.5                | 26.48                 | 0.977                 |
| WN/NC-1A  | 6.2                | 25.16                 | 0.895                 |

**Table S3.** The solution resistance ( $R_s$ ), charge transfer resistance ( $R_{ct}$ ) and pseudocapacitive resistance ( $R_{ps}$ ) parameters obtained from Electrochemical impedance spectroscopy (EIS) technique for WN/NC catalysts in 1 M KOH as electrolyte

| Compounds | $R_s$ ( $\Omega$ ) | $R_{ct}$ ( $\Omega$ ) | $R_{ps}$ ( $\Omega$ ) |
|-----------|--------------------|-----------------------|-----------------------|
| WN/NC-1   | 6.2                | 20.56                 | 0.624                 |
| WN/NC-2   | 5.8                | 32.16                 | 0.465                 |
| WN/NC-3   | 6.4                | 32.75                 | 0.346                 |
| WN/NC-1A  | 6.2                | 34.19                 | 0.122                 |
